# Supplementary material for: Transcriptional profiling of Toll-like receptor 2-deficient primary murine brain cells during Toxoplasma gondii infection
Source: PLoS One. 2017 Nov 14;12(11):e0187703. doi: 10.1371/journal.pone.0187703 (PMC5685635; doi:10.1371/journal.pone.0187703)
Supplement: S1 Table — (XLSX) [file pone.0187703.s006.xlsx]

## Sheet: S1 Table (Astrocyte_up)
Gene ID	Symbol	Mean normalized count
		WT uninfected	WT infected	KO uninfected	KO infected
ENSMUSG00000073555	Gm4951	1.34158	276.735	0.62241	4.74093
ENSMUSG00000054588	Gbp10	1.573	204.67	1.19808	4.18944
ENSMUSG00000035208	Slfn8	3.93599	419.957	7.35907	8.82408
ENSMUSG00000068245	Phf11d	1.29112	133.405	0.89506	3.54559
ENSMUSG00000090942	F830016B08Rik	2.40127	224.977	3.03376	7.48648
ENSMUSG00000078920	Ifi47	2.3421	195.683	2.36579	8.40682
ENSMUSG00000029605	Oas1b	3.12513	205.825	4.55123	8.38885
ENSMUSG00000027514	Zbp1	4.46671	263.242	5.1123	6.95693
ENSMUSG00000025498	Irf7	33.3533	1838.07	34.7138	62.8894
ENSMUSG00000037921	Ddx60	18.8935	1013.81	20.2992	36.3993
ENSMUSG00000032690	Oas2	3.13383	164.531	3.64039	2.86982
ENSMUSG00000023341	Mx2	12.6397	628.72	10.3794	18.0674
ENSMUSG00000079363	Gbp4	7.5379	366.913	10.363	15.2694
ENSMUSG00000028270	Gbp2	222.119	8277.86	136.015	254.874
ENSMUSG00000017830	Dhx58	11.8793	352.206	17.8108	17.8727
ENSMUSG00000082292	Gm12250	5.25321	151.705	4.87002	3.30303
ENSMUSG00000029298	Gbp9	44.989	1276.84	46.7243	92.0733
ENSMUSG00000074151	Nlrc5	19.5408	453.958	20.368	35.7894
ENSMUSG00000028268	Gbp3	112.964	2609.56	87.9181	143.415
ENSMUSG00000078853	Igtp	72.8194	1595.9	77.4869	99.7998
