# Supplementary material for: Transcriptional profiling of Toll-like receptor 2-deficient primary murine brain cells during Toxoplasma gondii infection
Source: PLoS One. 2017 Nov 14;12(11):e0187703. doi: 10.1371/journal.pone.0187703 (PMC5685635; doi:10.1371/journal.pone.0187703)
Supplement: S3 Table — (XLSX) [file pone.0187703.s008.xlsx]

## Sheet: Sheet1
Gene ID	Symbol	Mean normalized count
		WT uninfected	WT infected	KO uninfected	KO infected
ENSMUSG00000042993	Ifnk	1.03881	0.826817	1.5011	0.659811
ENSMUSG00000045364	Ifne	0	0.826817	0	0
ENSMUSG00000048806	Ifnb1	0	5.89034	0	0
ENSMUSG00000055170	Ifng	0	0	0	0
ENSMUSG00000059128	Ifnl2	0	0	0	0
ENSMUSG00000060747	Ifnl3	0	0	0	0
ENSMUSG00000063376	Ifna13	0	0	0	0
ENSMUSG00000070904	Ifna4	0	0	0	0
ENSMUSG00000070906	Ifna11	0	0	0	0
ENSMUSG00000070907	Ifna7	0.273186	0	0	0
ENSMUSG00000073811	Ifna12	0	0	0	0
ENSMUSG00000078353	Ifnab	0	0	0	0
ENSMUSG00000078354	Ifna2	0	0	0	0
ENSMUSG00000080964	Ifna-ps1	0	0	0	0
ENSMUSG00000095270	Ifna9	0	0	0	0
ENSMUSG00000095498	Ifna1	0	0	0	0
ENSMUSG00000095896	Ifna14	0	0	0	0
ENSMUSG00000096059	Ifna6	0	0	0	0
ENSMUSG00000096682	Ifna5	0	0	0	0
ENSMUSG00000096854	Ifnz	0.261009	0.850871	0.591448	0.332902
